# Supplementary material for: Break to Build: Isothermal Assembly of Nucleic Acid Nanoparticles (NANPs) via Enzymatic Degradation
Source: PubMed Central journal article supplement (PMC10288440; doi:10.1021/acs.bioconjchem.3c00167), 2023-06-09
Supplement: bc3c00167_si_001.pdf [file bc3c00167_si_001.pdf]

## Supporting Information

### **Break to build: isothermal assembly of nucleic acid nanoparticles (NANPs) via enzymatic degradation.**

Damian Beasock<sup>†#</sup>, Anh Ha<sup>†#</sup>, Justin Halman<sup>†</sup>, Martin Panigaj<sup>†</sup>, Jian Wang<sup>‡</sup>, Nikolay V. Dokholyan<sup>‡,§</sup>, Kirill A. Afonin<sup>†\*</sup>

<sup>†</sup> Nanoscale Science Program, Department of Chemistry, University of North Carolina at Charlotte, Charlotte, NC, 28223, USA

<sup>‡</sup> Department of Pharmacology, Department of Biochemistry & Molecular Biology, Penn State College of Medicine, Hershey, PA, 17033, USA

<sup>§</sup> Department of Biochemistry & Molecular Biology, Department of Biochemistry & Molecular Biology, Penn State College of Medicine, Hershey, PA, 17033, USA

# - these authors contributed equally to this project

\* To whom correspondence should be addressed. Tel: +1 704 687 0685; Fax: +1 704 687 0960; Email: kafonin@uncc.edu

## SEQUENCES USED IN THIS PROJECT

### RNA cube:

rA- 5'- GGCAACUUUGAUCCUCGGUUUAGCGCCGGCCUUUUCUCCCACACUUUCACG

rB- 5'- GGGAAAUUUCGUGGUAGGUUUUGUUGCCCGUGUUUCUACGAUUACUUUGGUC

rC- 5'- GGACAUUUUCGAGACAGCAUUUUUCCCGACCUUUGCGGAUUGUAUUUUAGG

rD- 5'- GGCPCUUUUGACCUUCUGCUUUUUGUCCCCUAUUUCUUAUUGACUUUUGGCC

rE- 5'- GGGAGAUUUAGUCAUUAAGUUUUACAAUCCGCUUUGUAAUCGUAGUUUGUGU

rF- 5'- GGGAUUUUACCUACCACGUUUUGCUGUCUCGUUUGCAGAAGGUCUUUCCGA

rD-AI488:

5'- GGCPCUUUUGACCUUCUGCUUUUUGUCCCCUAUUUCUUAUUGACUUUUGGCC/AI488/

### DNA cubes with three As at each corner (all strands are complementary to corresponding cube strands):

anti-dA- 5'- CGTGAAAGTGTGGGAGAAAAGGCCGGCGCTAAACCGAGGGATCAAAGTTGCC

anti-dB- 5'- GACCAAAGTAATCGTAGAAACACGGGCAACAAAACCTACCACGAAATTTCCC

anti-dC- 5'- CCTAAAATACAATCCGCAAAGGTCGGGAAAAAATGCTGTCTCGAAAATGTCC

anti-dD- 5'- GGCCAAAAGTCATTAAGAAATAGGGGACATAAAGCAGAAGGTCAAAGCGCC

anti-dE- 5'- ACACAAACTACGATTACAAAGCGGATTGTAAACTTAATGACTAAATCTCCC

anti-dF- 5'- TCGGAAAGACCTTCTGCAAACGAGACAGCAAACGTGGTAGGTAAAGATCCC

anti-dDAI546:

5'- /AI546/GGCCAAAAGTCATTAAGAAATAGGGGACATAAAGCAGAAGGTCAAAGCGCC

### DNA strands required to form RNA/DNA fibers when mixed with RNA cube strands

For the RNA/DNA fibers, the 15mer overlaps have been color-coded to reflect their intended interactions.

Holding A

5'**TAGGCACCTTGCTAA**CGTGAAAGTGTGGGAGAAAAGGCCGGCGCTAAACCGAGGGATCAAAGTTGCC

Holding B

5'**TTAGCAAGGTGCCTA**GACCAAAGTAATCGTAGAAACACGGGCAACAAAACCTACCACGAAATTTCCC**GTATACGACGCGCTA**

Holding C

5'**CTACGGTCATATTGC**CCTAAAATACAATCCGCAAAGGTCGGGAAAAAATGCTGTCTCGAA  
AATGTCC**TAGCGCGTCGTATAC**

Holding D

5'**GCAATATGACCGTAG**GGCCAAAAGTCATTAAGAAATAGGGGACATAAAGCAGAAGGTCAA  
AAGCGCC**GTCACTGATGTCAGA**

Holding E

5'**ACGACTGTCAGGTCA**ACACAAACTACGATTACAAAGCGGATTGTAAAACCTAATGACTAAA  
TCTCCC**TCTGACATCAGTGAC**

Holding F

5'**TGACCTGACAGTCGT**TCGGAAAGACCTTCTGCAAACGAGACAGCAAACGTGGTAGGTA  
AAGATCCC

## SUPPORTING FIGURES

*a*

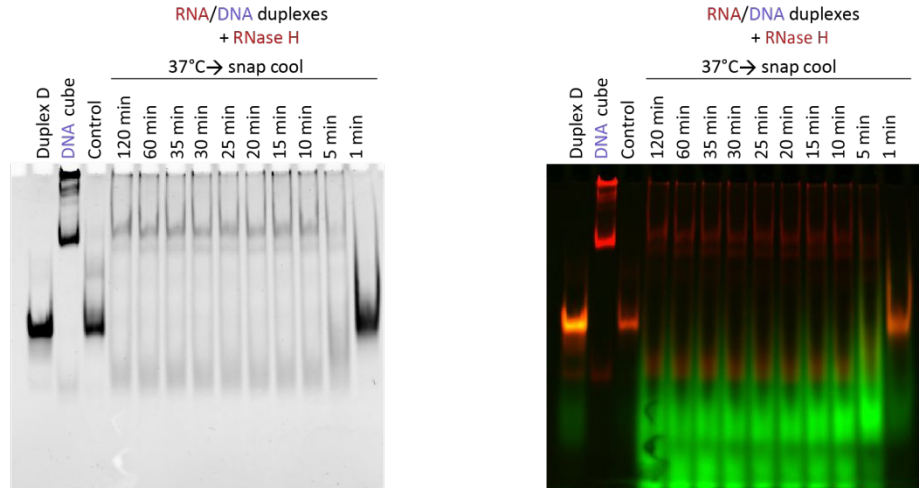

*b*

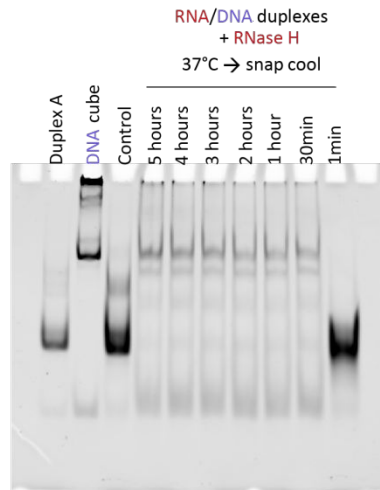

*c*

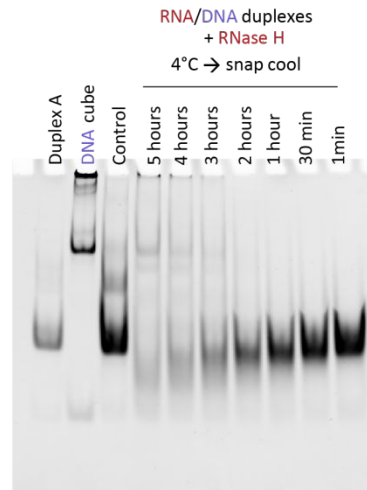

**Supporting Figure S1:** Kinetics of RNase H-driven DNA cube assembly assessed at different temperatures. (a) Fluorescently labeled (with Alexa 488 and Alexa 546) RNA/DNA hybrid duplexes were treated with RNase H and incubated at either 37°C or 4°C from 1 minute to 2 hours. The reactions were stopped by snap cooling in liquid nitrogen. (b, c) RNA/DNA hybrid duplexes treated with RNase H incubated at either 37°C or 4°C from 1 minute to 5 hours. Control samples were treated with endotoxin free water instead of RNase H and incubated for 5 hours at either 37°C or 4°C. Interestingly, the second band is visible in nuclease-driven assembly but not in control DNA cubes. The likely explanation is that the two bands appear as an artifact arising from snap freezing in liquid nitrogen that caused cold-denaturation leading to destabilization of the DNA cube structure.

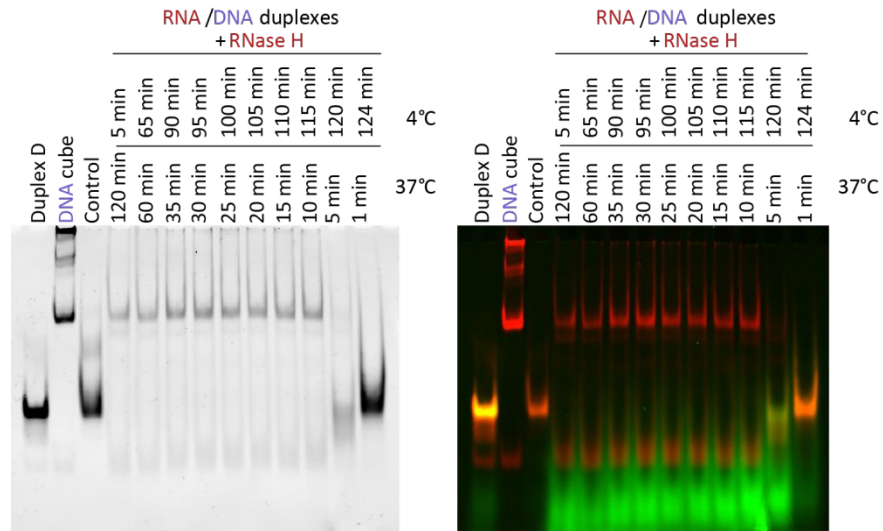

**Supporting Figure S2:** Kinetics of RNase H-driven DNA cube assembly at 37° C followed by incubation at 4°C. RNA/DNA hybrid duplexes fluorescently labeled with Alexa 488 and Alexa 546 were treated with RNase H from 1 minute to 120 minutes at 37° C and stored at 4°C.

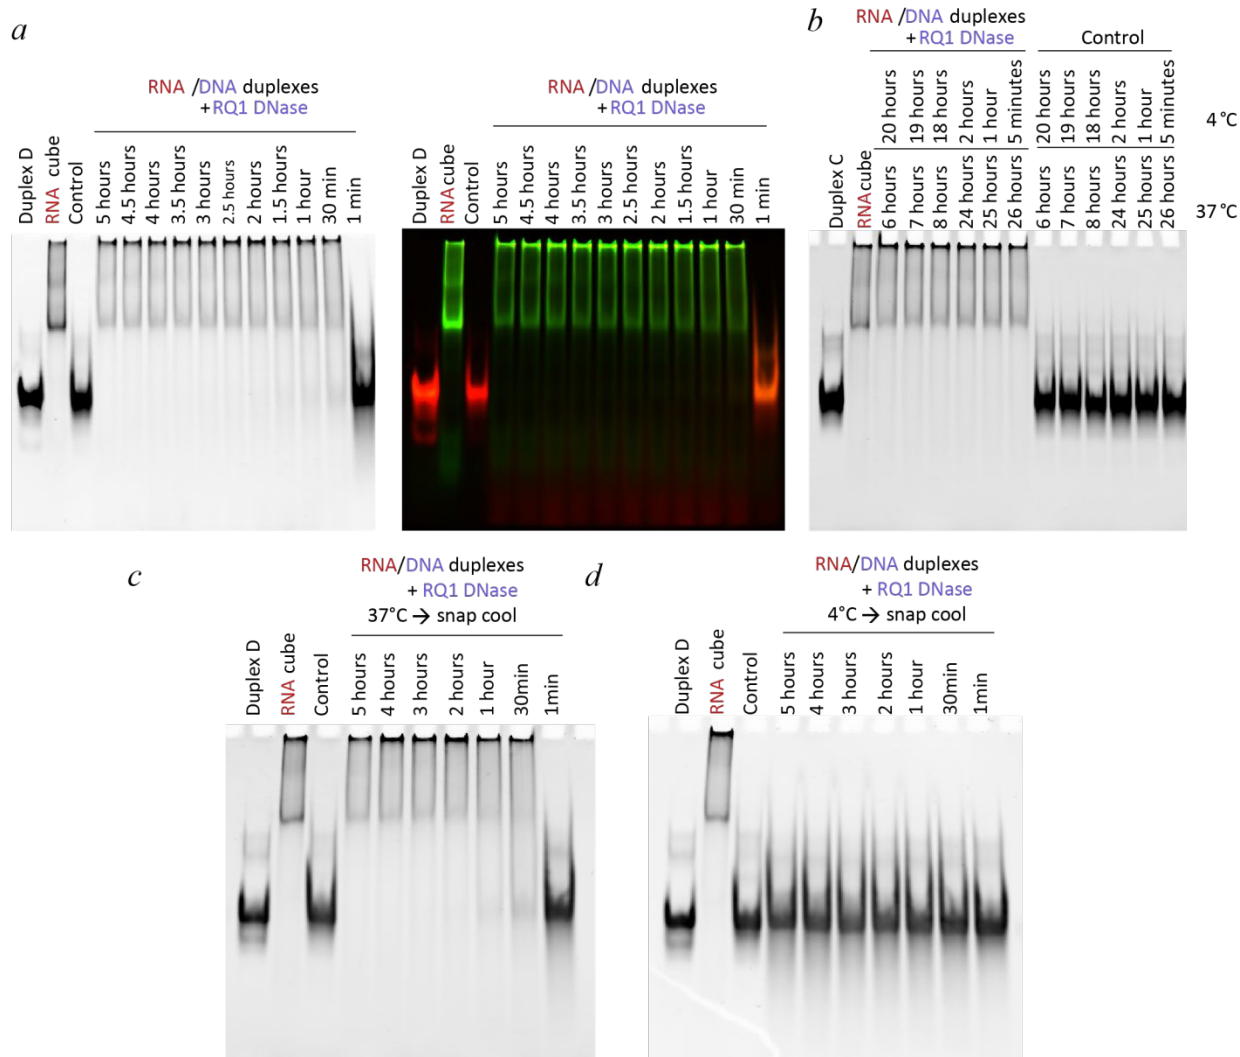

**Supporting Figure S3:** Kinetics of RQ1 DNase-driven RNA cube assembly. (a) Fluorescently labeled (with Alexa 488 and Alexa 546) RNA/DNA hybrid duplexes were treated with RQ1 DNase from 1 minute to 5 hours at 37 °C. (b) RNA/DNA hybrid duplexes treated with RQ1 DNase were incubated at 37°C from 6 hours to 26 hours and stored at 4°C for indicated time. Control samples were treated with endotoxin free water instead of RQ1 DNase and incubated 26 hours at 37°C and stored at 4°C for 5 minutes. (c, d) RNA/DNA hybrid duplexes treated with RQ1 DNase incubated at 37°C or 4°C from 1 minute to 5 hours; the reactions were stopped by snapped cooling in liquid nitrogen. Control samples were treated with endotoxin free water instead of RQ1 DNase and incubated 5 hours at either 37°C or 4°C.

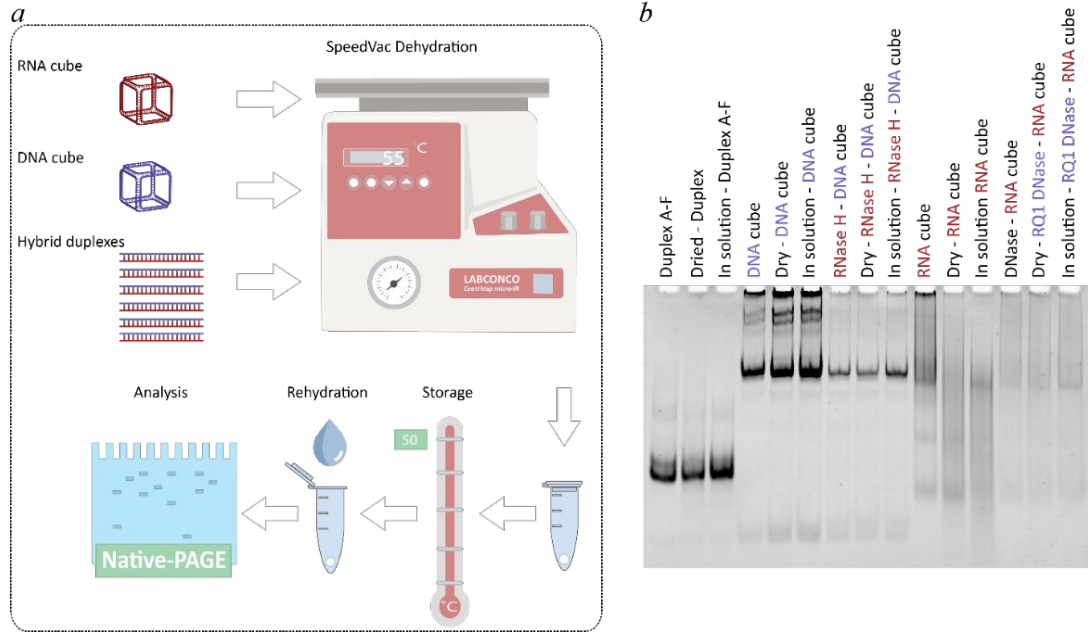

**Supporting Figure S4:** Effect of storage conditions on stabilities of RNA/DNA hybrid duplexes, controlled cubes, and nuclease-driven cube assemblies. (a) Schematic of experimental workflow for RNA cubes, DNA cubes and RNA/DNA hybrid duplexes storage under elevated temperature. (b) Native-PAGE analysis of structural integrities of DNA cubes, RNA cubes, and RNA/DNA hybrid duplexes after storage at +50°C either in solution or in dehydrated state.

*a*

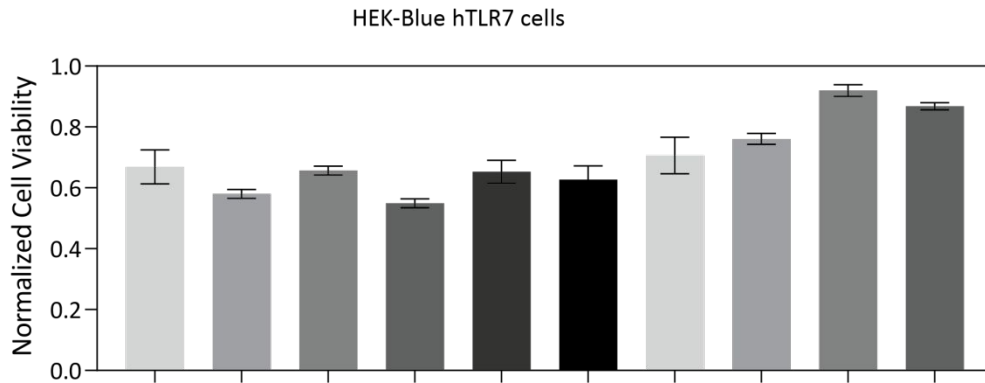

*b*

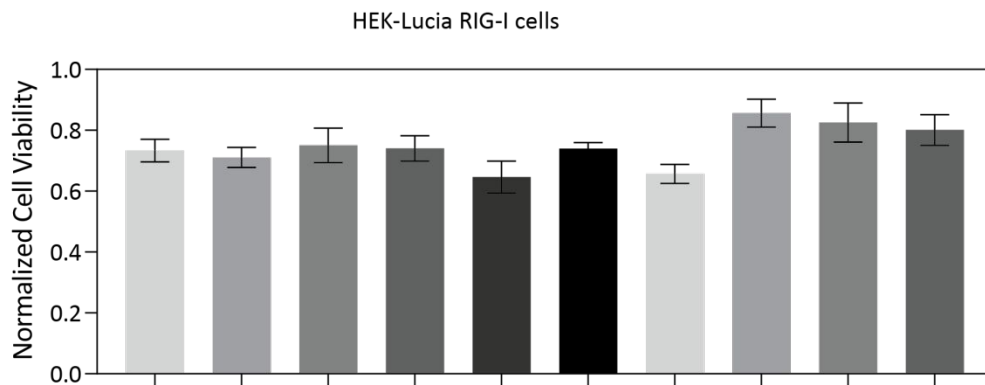

|           | DNA cube | RNA/DNA duplex | RNA cube | RNA/DNA duplex | Fibers | Fibers | RNA/DNA duplex | 1X AB | PC |   |
|-----------|----------|----------------|----------|----------------|--------|--------|----------------|-------|----|---|
| L2K       | +        | +              | +        | +              | +      | +      | +              | -     | +  | + |
| RQ1 DNase | -        | -              | -        | +              | -      | +      | -              | -     | -  | - |
| RNase H   | -        | +              | -        | -              | -      | -      | -              | -     | -  | - |

**Supporting Figure S5:** Cell viability of reporter HEK-Blue hTLR7 and HEK-Lucia RIG-I reporter cell line by transfected cubes, RNA/DNA fibers, and RNA/DNA duplexes. (a) Normalized cell viability in treated HEK-Blue hTLR7 cell line. n= 4,  $\pm$ SEM. (b) HEK-Lucia RIG-I viability, n= 3,  $\pm$ SEM. Normalized to untreated cells.



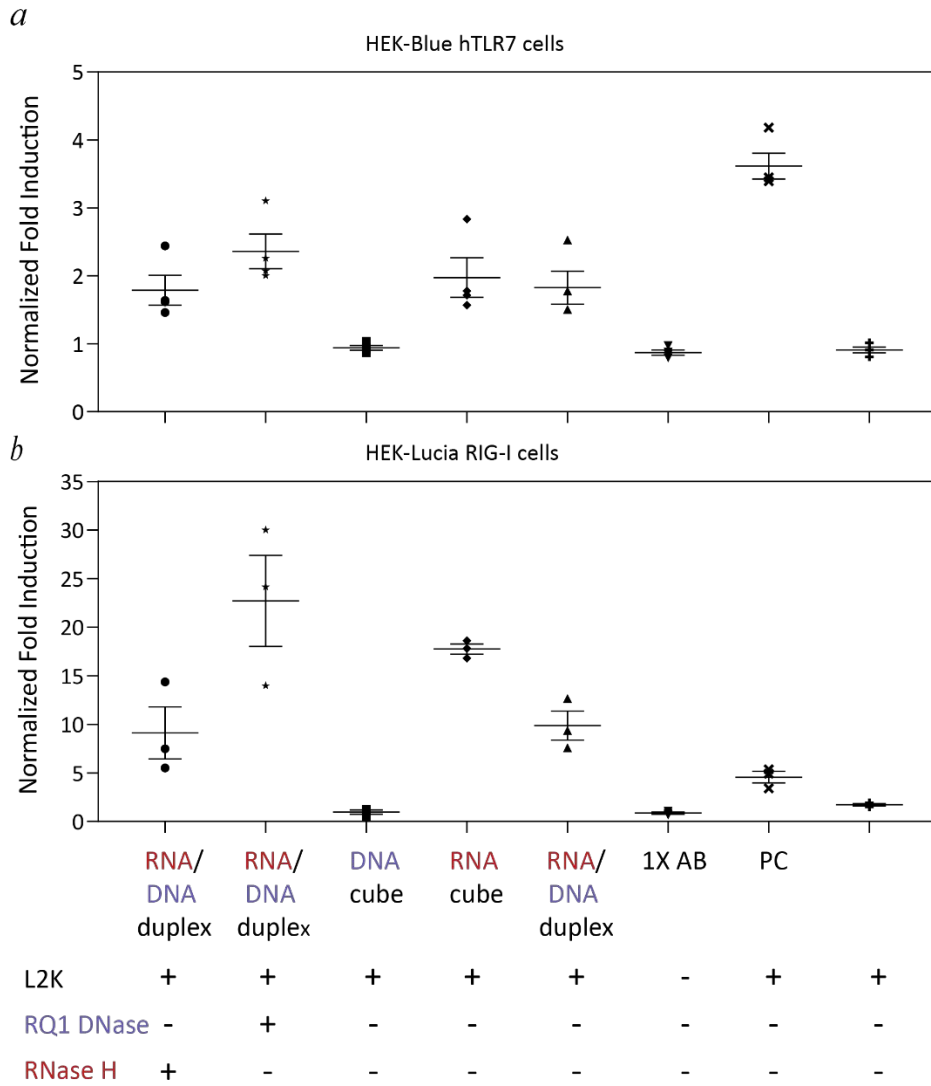

**Supporting Figure S6:** Immunostimulatory properties of RNA or DNA cubes in reporter HEK-Blue hTLR7 and HEK-Lucia RIG-I reporter cells. Normalized to untreated cells.
